# Supplementary material for: Colorimetric reverse transcription loop-mediated isothermal amplification (RT-LAMP) as a visual diagnostic platform for the detection of the emerging coronavirus SARS-CoV-2
Source: Royal Society of Chemistry journal article supplement (doi:10.1039/d0an01775b), 2020-10-28
Supplement: d0an01775b1.pdf [file d0an01775b1.pdf]

Supplementary material

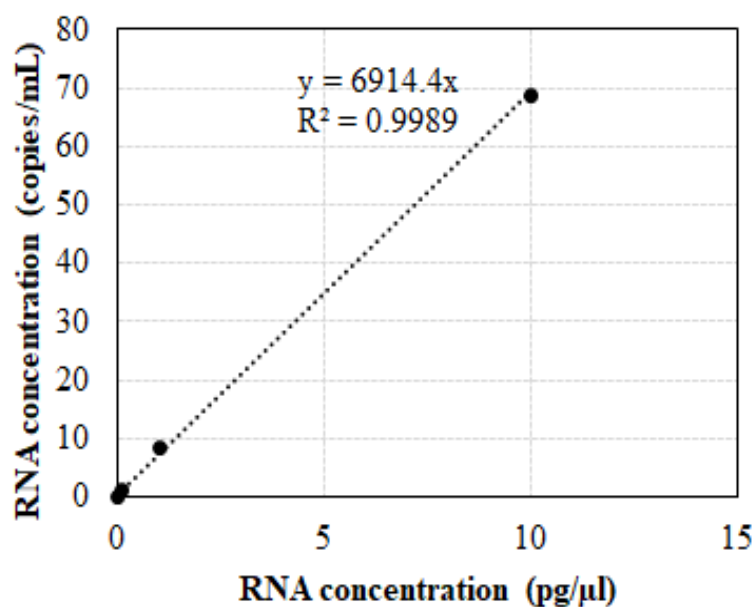

**Figure S1** Calibration curve constructed at various RNA concentration of SARS-CoV-2 (0.01, 0.1, 1, 10 pg/μl) determined by ddPCR

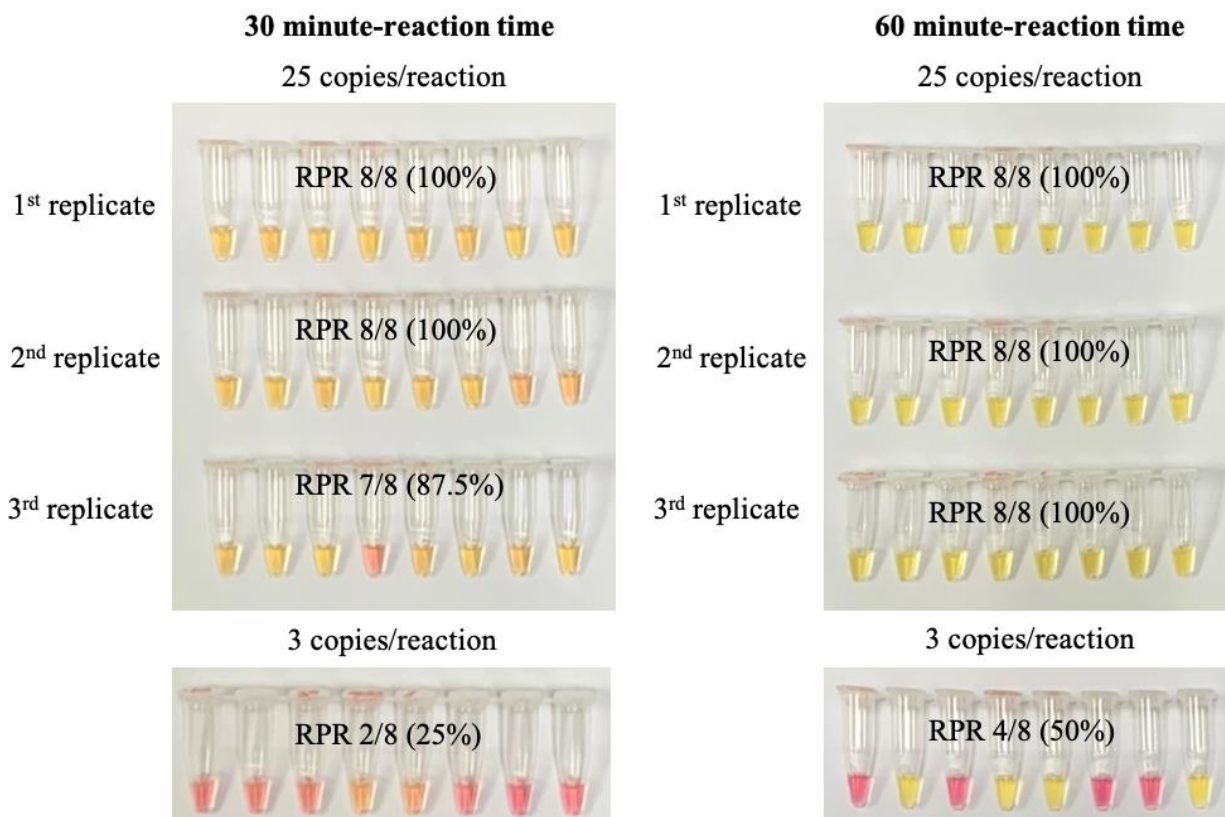

**Figure S2** Eight replicates test for each reaction time (30 and 60 minutes) and the hit rate was calculated based on the number of positive reactions

**Table S1** Sensitivity determination of colorimetric RT-LAMP for SARS-CoV-2 detection under the presence of negative specimen matrix

| RNA concentration<br>(copies/reaction) |                    | NTC                                                                                | 3              | 25             | 63             | 125            | 188            | 250            | 2,500          |
|----------------------------------------|--------------------|------------------------------------------------------------------------------------|----------------|----------------|----------------|----------------|----------------|----------------|----------------|
| RT-LAMP                                | Color              |  |                |                |                |                |                |                |                |
|                                        | Positive/<br>Total | 0/3                                                                                | 1/3            | 3/3            | 3/3            | 3/3            | 3/3            | 3/3            | 3/3            |
|                                        | Hit rate (%)       | 0                                                                                  | 33             | 100            | 100            | 100            | 100            | 100            | 100            |
| qRT-PCR<br>Ct<br>(Mean±SD)             | ORF1ab             | N.D.                                                                               | 38.69<br>±1.81 | 33.06<br>±0.35 | 31.71<br>±0.25 | 30.71<br>±0.17 | 30.40±<br>0.31 | 29.80±<br>0.33 | 25.94±<br>0.18 |
|                                        | N                  | N.D.                                                                               | 34.24<br>±0.71 | 30.81<br>±1.26 | 29.68<br>±1.09 | 28.8±<br>1.09  | 28.29±<br>0.93 | 27.96±<br>0.82 | 23.95±<br>0.96 |

NTC = Non-template Control and N.D. = Not detected
